# Supplementary material for: Driving Organic Nanocrystals Dissolution Through Electrochemistry
Source: PubMed Central journal article supplement — ChemistryOpen. 2021 Aug 5;10(8):748–55. doi: 10.1002/open.202100076 (PMC8340066; doi:10.1002/open.202100076), 2021-08-05
Supplement: OPEN-10-748-s001.pdf [file OPEN-10-748-s001.pdf]

# ChemistryOpen

Supporting Information

## **Driving Organic Nanocrystals Dissolution Through Electrochemistry**

Gianlorenzo Bussetti,\* Claudia Filoni, Andrea Li Bassi, Alberto Bossi, Marcello Campione, Alessio Orbelli Biroli, Chiara Castiglioni, Silvia Trabattoni, Stefania De Rosa, Luca Tortora, Franco Ciccacci, and Lamberto Duò

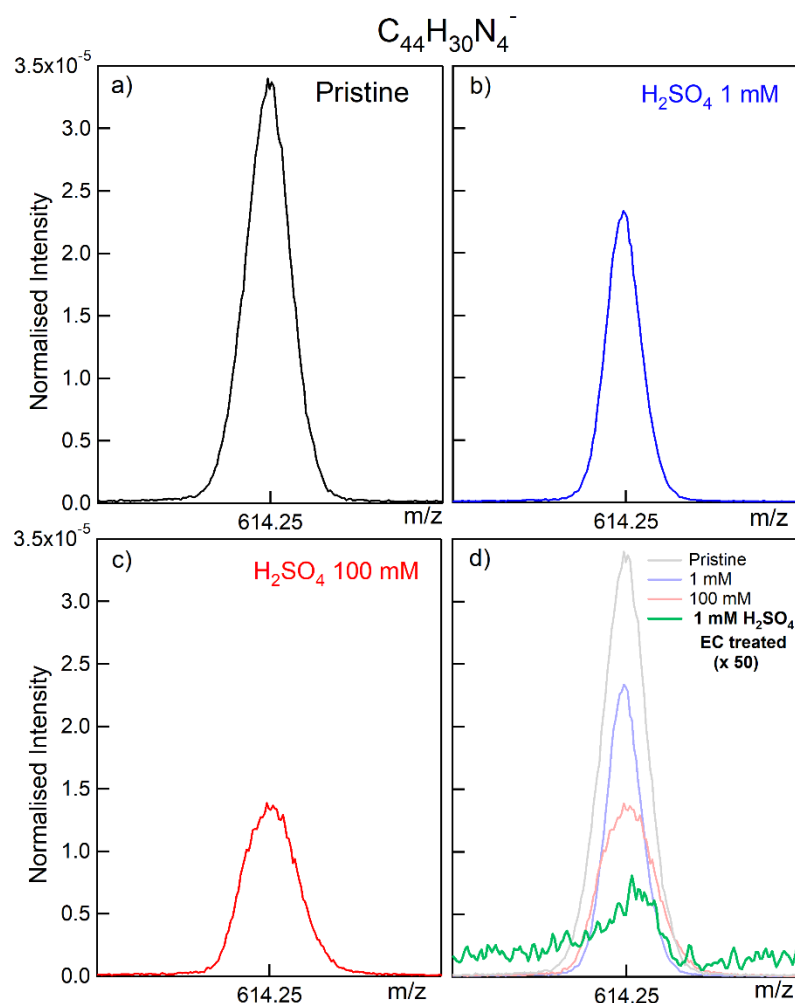

**Figure S1.** Normalized ToF-SIMS peaks intensity of  $C_{44}H_{30}N_4^-$  ( $m/z = 614.25$ ) ion from pristine  $H_2$ TPP/HOPG electrode (panel *a*),  $H_2$ TPP/HOPG electrode immersed in 1 mM and 100 mM  $H_2SO_4$  electrolyte (panels *b* and *c*, respectively), and from  $H_2$ TPP/HOPG electrode after ten subsequent CVs in 1 mM  $H_2SO_4$  electrolyte (green line in panel *d*) compared with the peaks of pristine and immersed samples.

ToF-SIMS experiments were conducted on the as grown  $H_2$ TPP film on HOPG substrate,  $H_2$ TPP/HOPG electrode immersed in 1 mM and 100 mM  $H_2SO_4$  solutions, and  $H_2$ TPP/HOPG electrode after tens of subsequent CVs in 1 mM  $H_2SO_4$  electrolyte. Secondary ions from the  $H_2$ TPP fragmentation process were collected for the four samples. We monitored the intensity evolution of two representative ion peaks of the porphyrin macrocycle ( $C_{44}H_{30}N_4^-$  at 614.25  $m/z$  and  $C_9H_5N_2^-$  at  $m/z$  141.05), in order to further illustrate the changes in the surface chemistry of the samples. The plots in **Figure S1(a-c)** show the normalized signal intensity of the  $H_2$ TPP molecular ion peak

( $C_{44}H_{30}N_4^-$ ) of the as grown sample, the electrode immersed in the 1 mM  $H_2SO_4$  solution, where etch pits have been observed, and the sample characterized by bulges (immersed in 100 mM  $H_2SO_4$  solution), respectively<sup>[1]</sup>. The signal intensity drops together with the increase of the acid concentration, as previously observed<sup>[1]</sup>. The decrease of the  $C_{44}H_{30}N_4^-$  signal intensity could suggest the degradation of the  $H_2TPP$  macrocycle. The  $C_{44}H_{30}N_4^-$  peak of the electrochemically treated sample is reported in Figure S1*d* (green line). In this latter case, the  $C_{44}H_{30}N_4^-$  normalized intensity is very low. Compared to the pristine and immersed samples, the secondary ion from the whole porphyrin molecule seems to be almost absent. This result could suggest that the EC treatment in 1 mM  $H_2SO_4$  solution has a much more destructive effect on the  $H_2TPP/HOPG$  sample surface than simple immersion in the acid solution with the same concentration (1 mM) and also with the higher one (100 mM).

In **Figure S2**, the normalized intensity of the  $C_9H_{30}N_4^-$  ion peaks, probably coming from the fragmentation of two pyrrole units of the tetrapyrrolic macrocycle, are shown. The changes in  $C_9H_{30}N_4^-$  ion peak intensity among the pristine, immersed, and EC treated samples follow substantially the same behavior of the  $H_2TPP$  molecular ion peak. Starting from the pristine sample, the gradual decrease in intensity, increasing the acid concentration, is still appreciable in Figure S2(*a-c*). In Figure S2*d*, the  $C_9H_{30}N_4^-$  ion low intensity confirms the more aggressive action of the EC routine on the  $H_2TPP/HOPG$  sample surface, compared to that of the simple immersion.

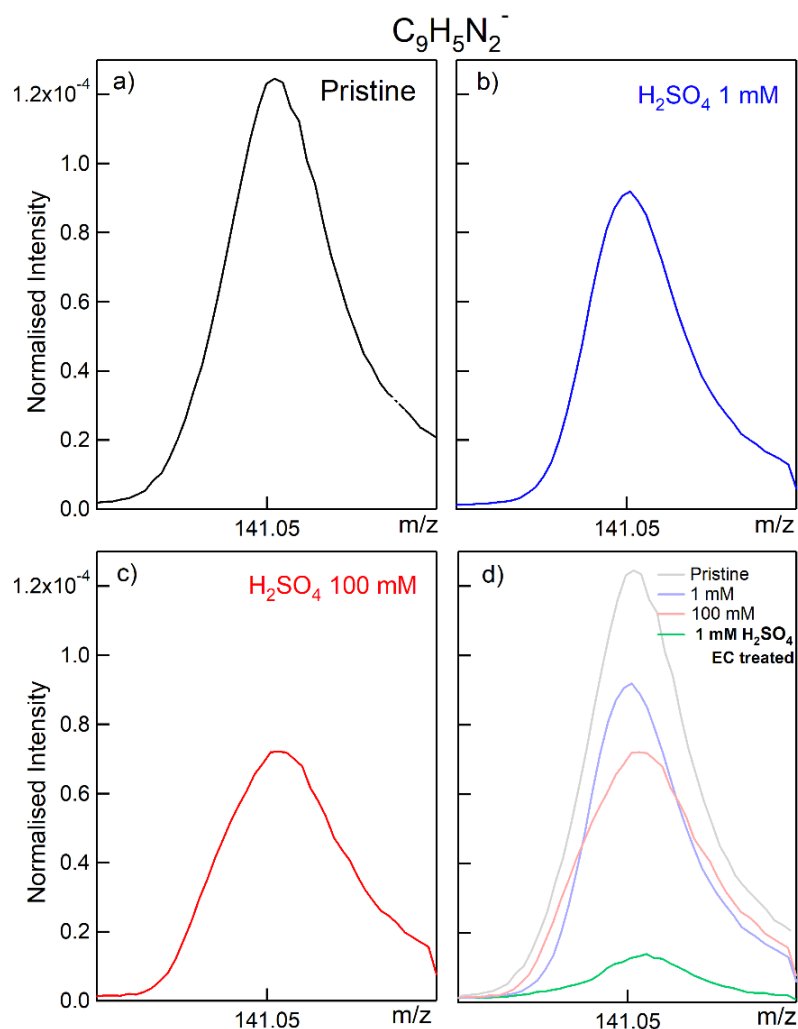

**Figure S2.** Normalized ToF-SIMS peak intensity of  $C_9H_5N_2^-$  ( $m/z = 141.05$ ) ion from pristine  $H_2$ TPP/HOPG sample (panel *a*),  $H_2$ TPP/HOPG sample immersed in 1 mM and 100 mM  $H_2SO_4$  electrolyte (panels *b* and *c*, respectively), and from  $H_2$ TPP/HOPG sample after ten subsequent CVs in 1 mM  $H_2SO_4$  electrolyte (green line in panel *d*) compared with the peaks of pristine and immersed samples.

## References

C. Filoni, L. Duò, F. Ciccacci, A. Li Bassi, A. Bossi, M. Campione, G. Capitani, I. Denti, M. Tommasini, C. Castiglioni, S. De Rosa, L. Tortora, G. Bussetti, *Chem. NanoMat.*, **2020**, 6, 567.
